# Supplementary material for: Multidrug resistance from a one health perspective in Ethiopia: A systematic review and meta-analysis of literature (2015–2020)
Source: PubMed Central journal article supplement — One Health. 2022 Apr 20;14:100390. doi: 10.1016/j.onehlt.2022.100390 (PMC9171526; doi:10.1016/j.onehlt.2022.100390), 2022-04-20
Supplement: mmc1.pdf [file mmc1.pdf]

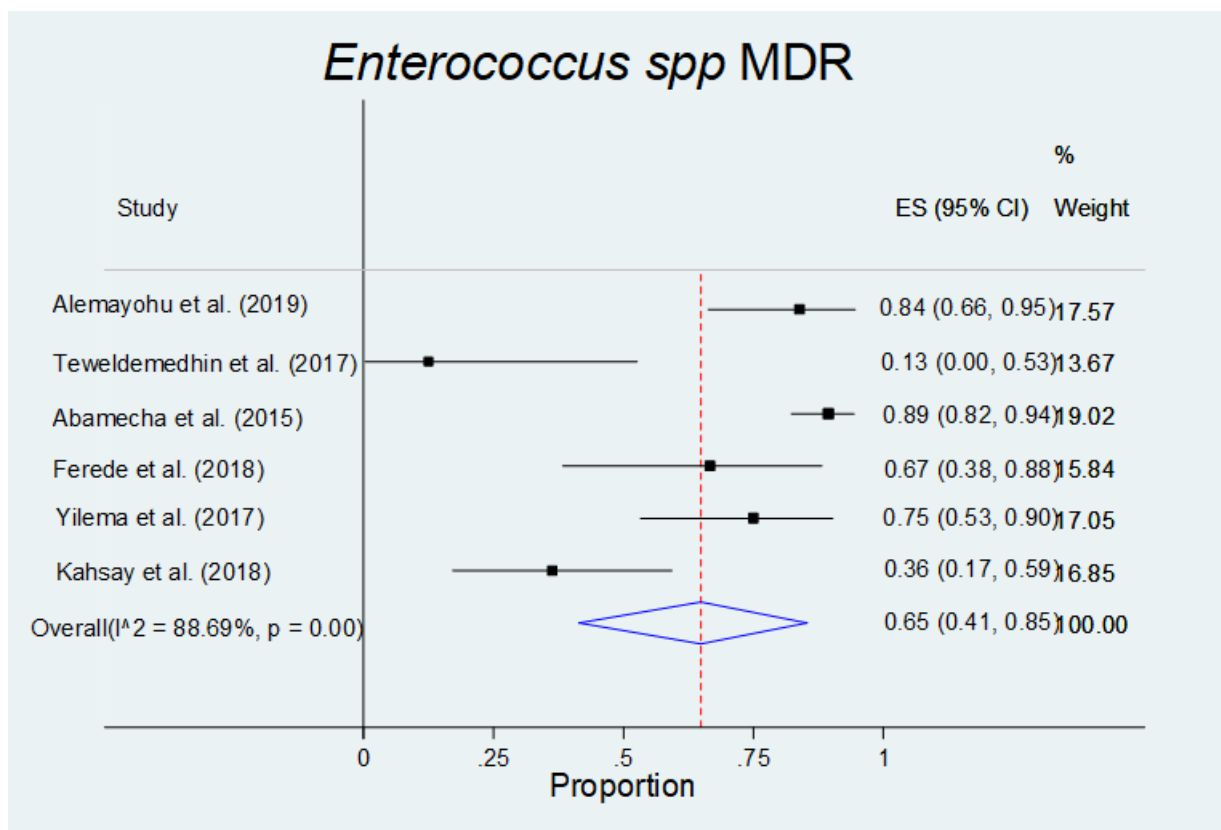

\Supplementary Figure 1: Forest plot of the pooled proportion of MDR in *Enterococcus spp.* in human

## *E. coli* MDR

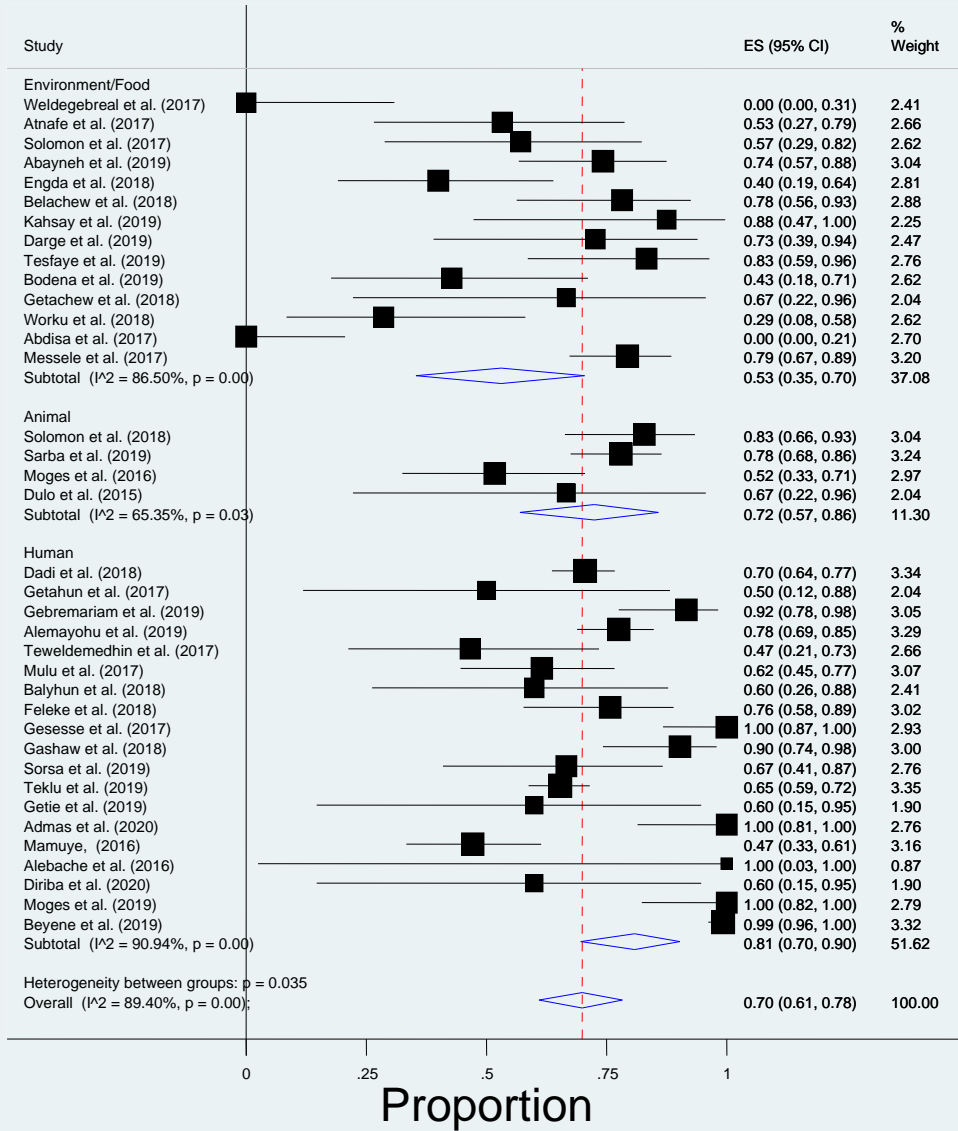

Supplementary Figure 2: Forest plot of the pooled proportion of MDR *E. coli*. from all sources (human, animal, environment or food).

## Klebsiella spp MDR

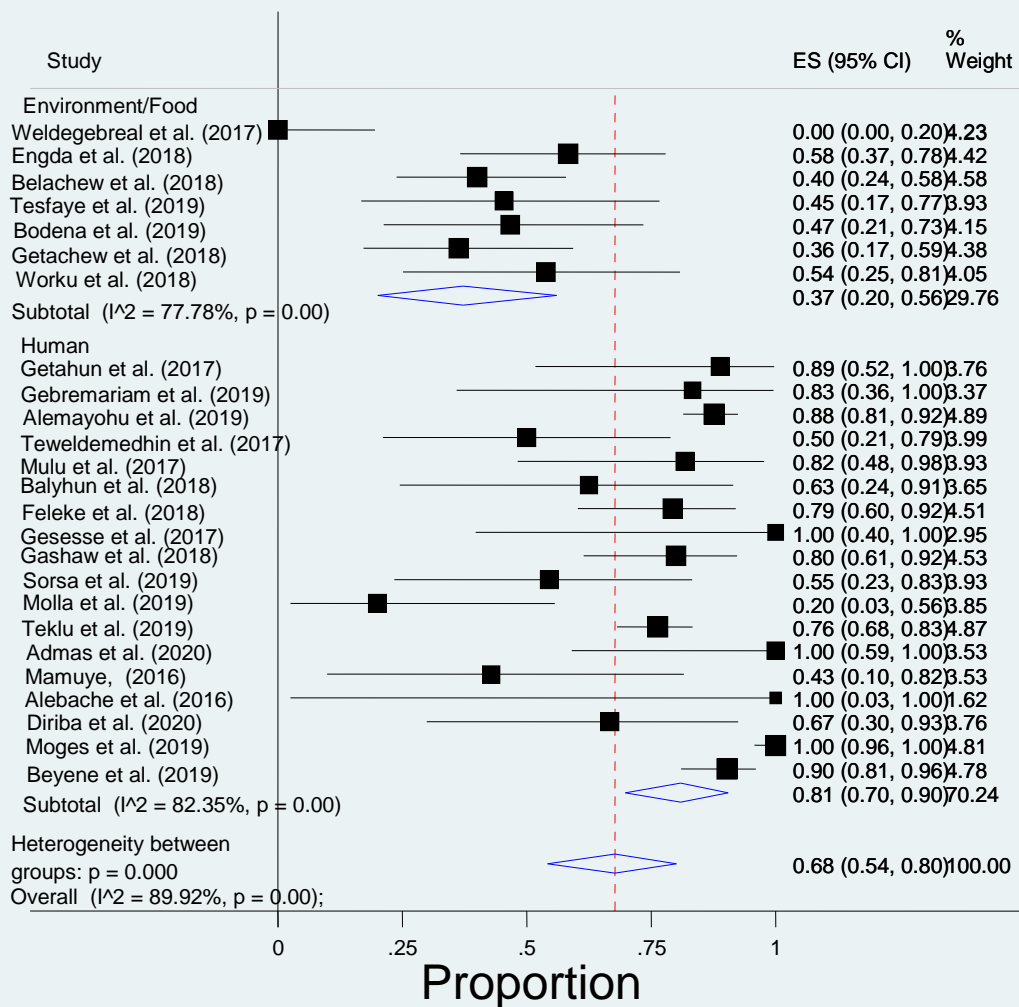

Supplementary Figure 3: Forest plot of the pooled proportion of MDR *Klebsiella spp.* from human, environment or food sources.

## *Enterobacter spp* MDR

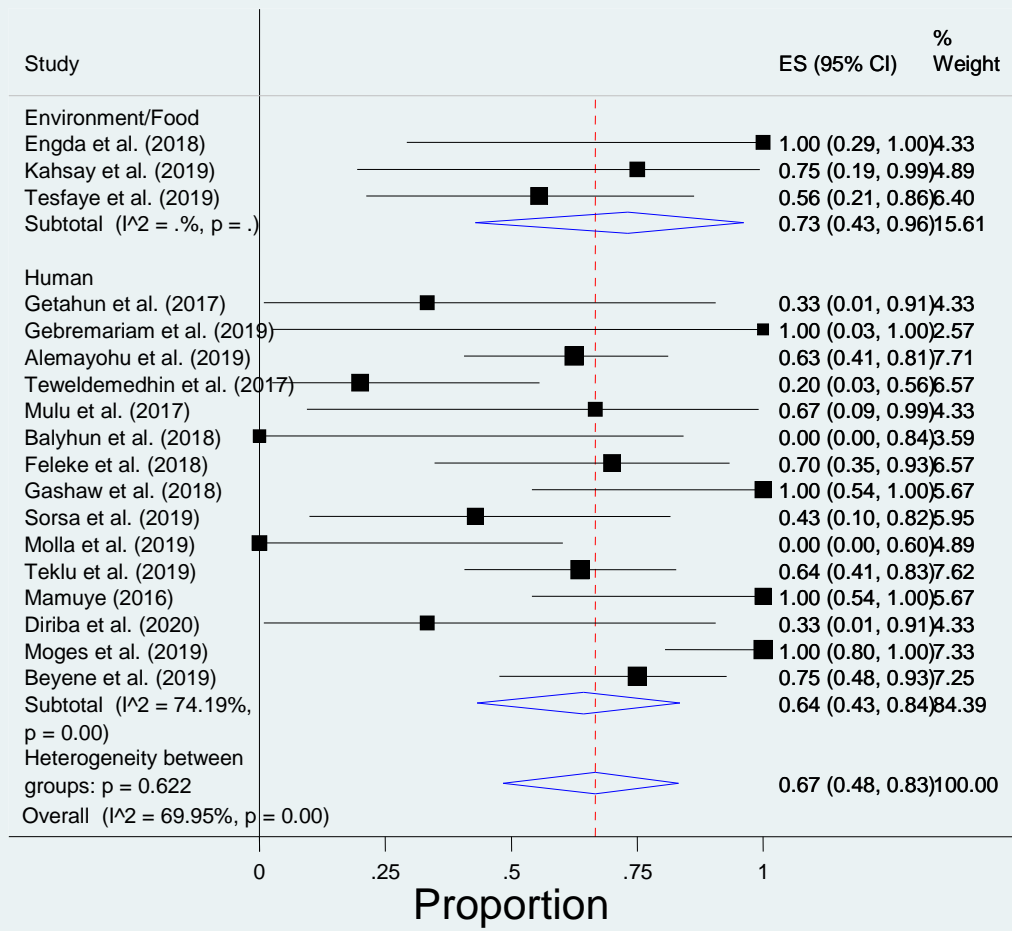

Supplementary Figure 4: Forest plot of the pooled proportion of MDR *Enterobacter spp.* from human, environment or food sources.

## *Citrobacter spp* MDR

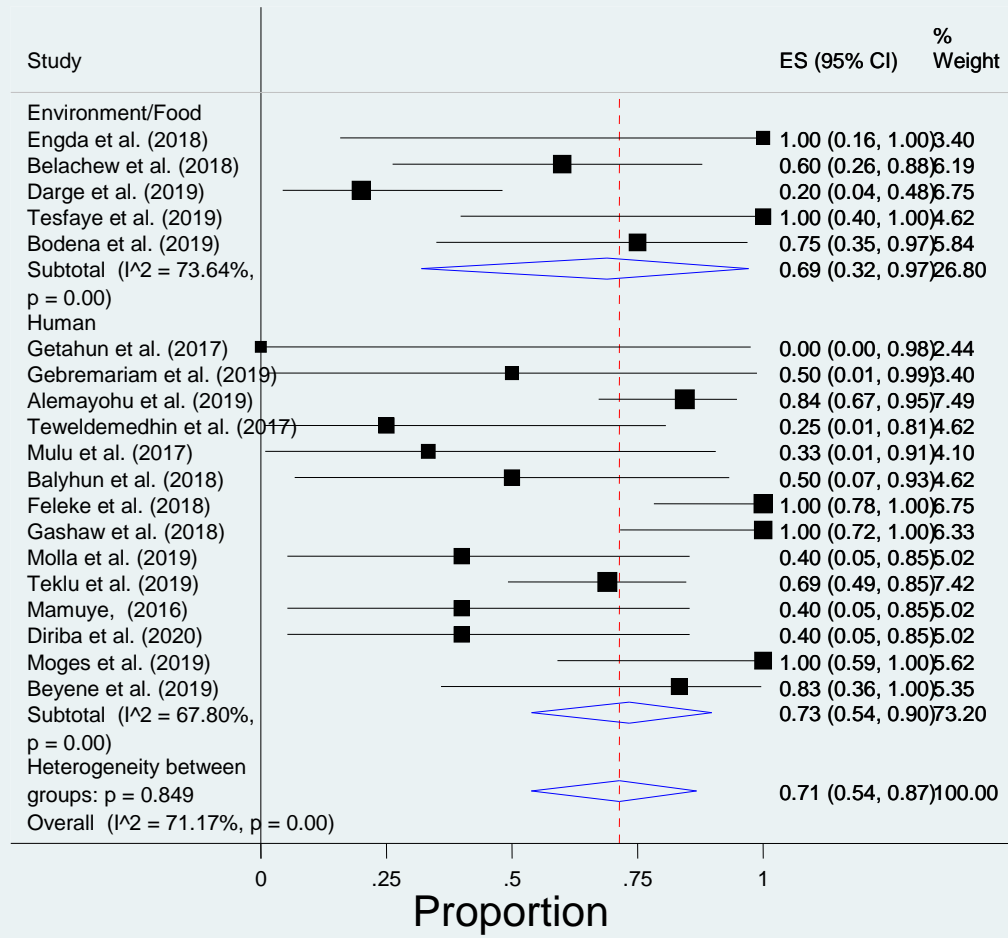

Supplementary Figure 5: Forest plot of the pooled proportion of MDR *Citrobacter spp.* from human, environment or food sources.

## Salmonella spp. MDR

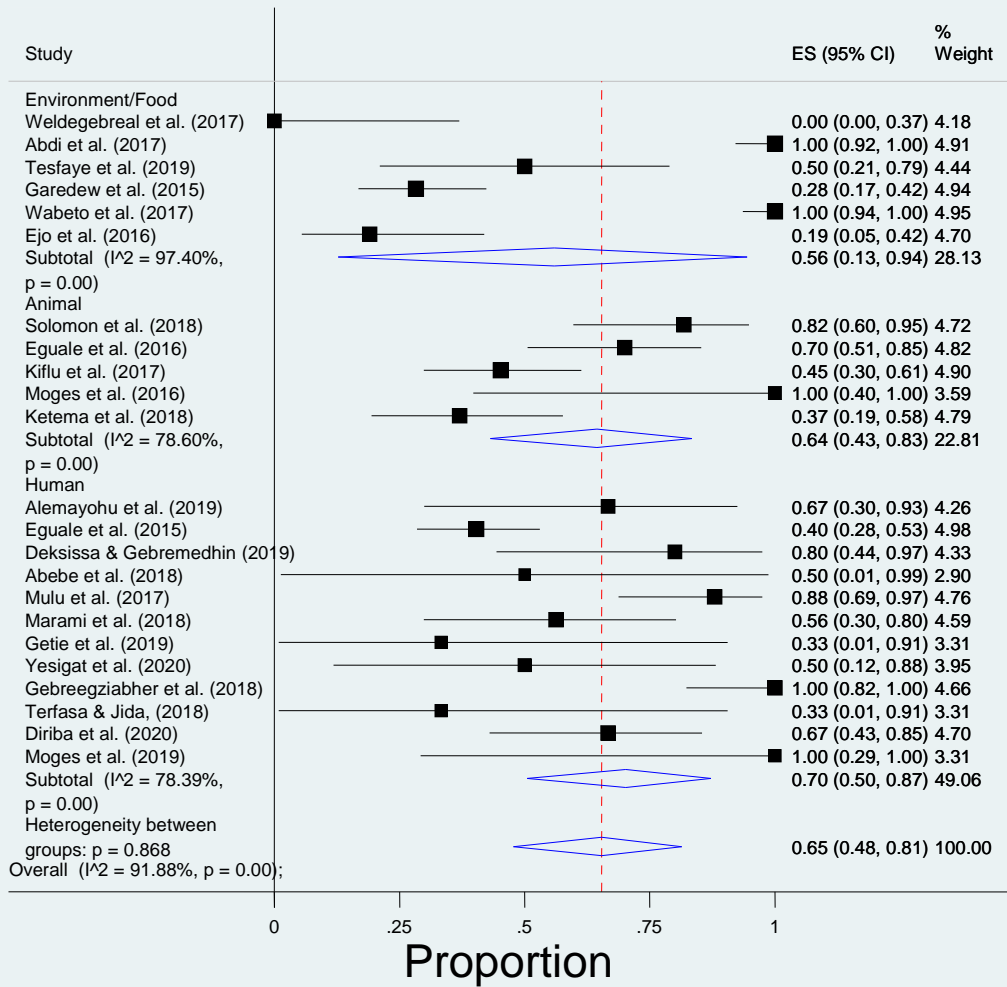

Supplementary Figure 6: Forest plot of the pooled proportion of MDR *Salmonella* spp. from humans, animals, and environment/food sources.

## *Shigella spp* MDR

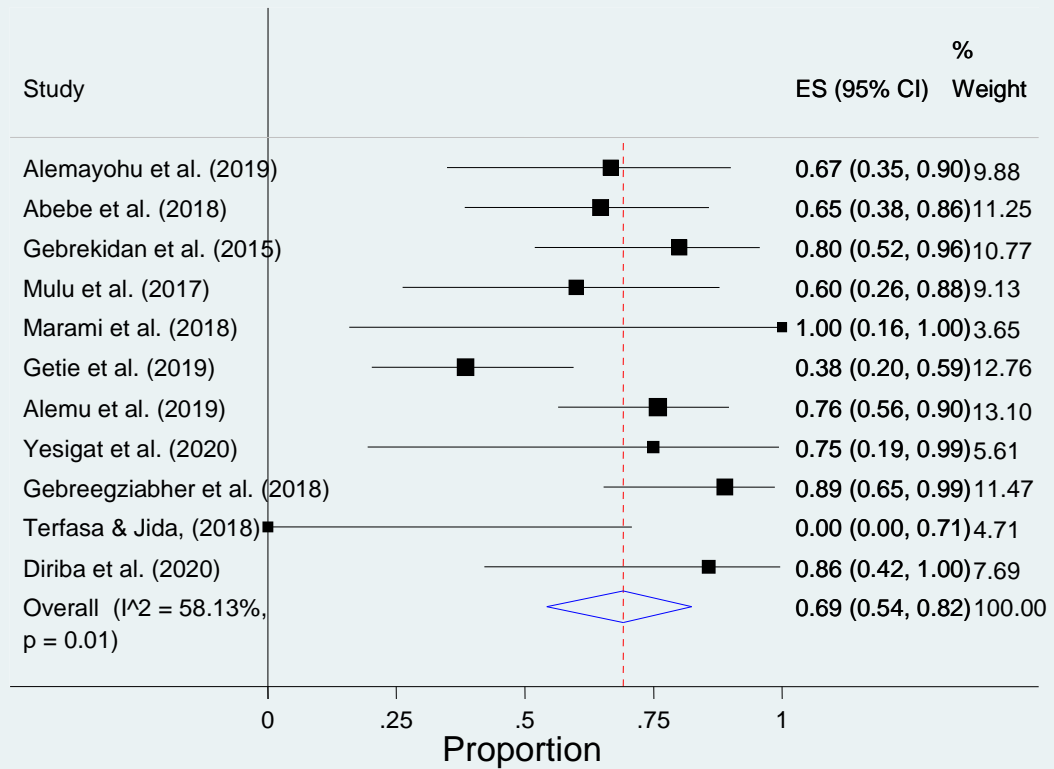

Supplementary Figure 7: Forest plot of the pooled proportion of MDR *Shigella spp.* from humans, animals, and environment/food sources.

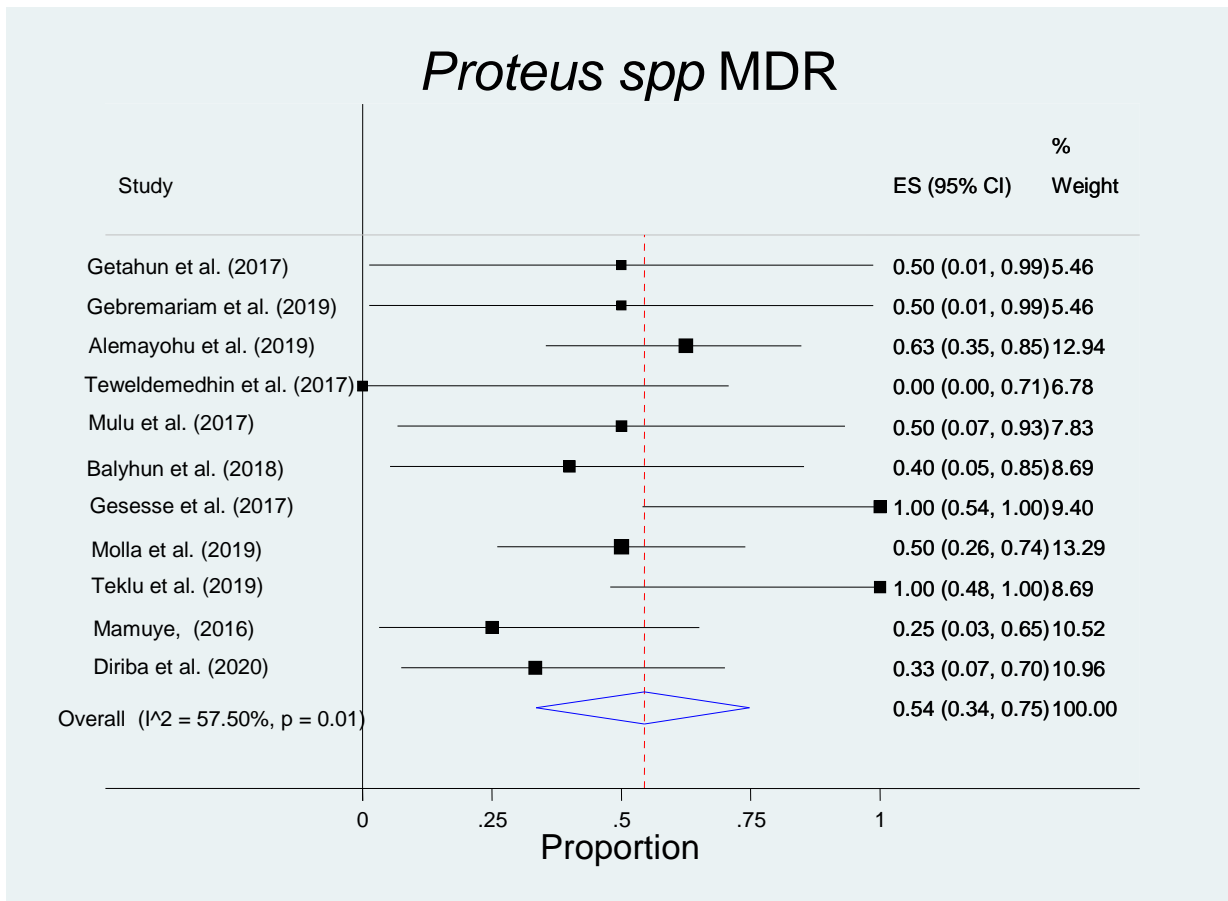

Supplementary Figure 8: Forest plot of the pooled proportion of MDR *Proteus spp.* from human sources



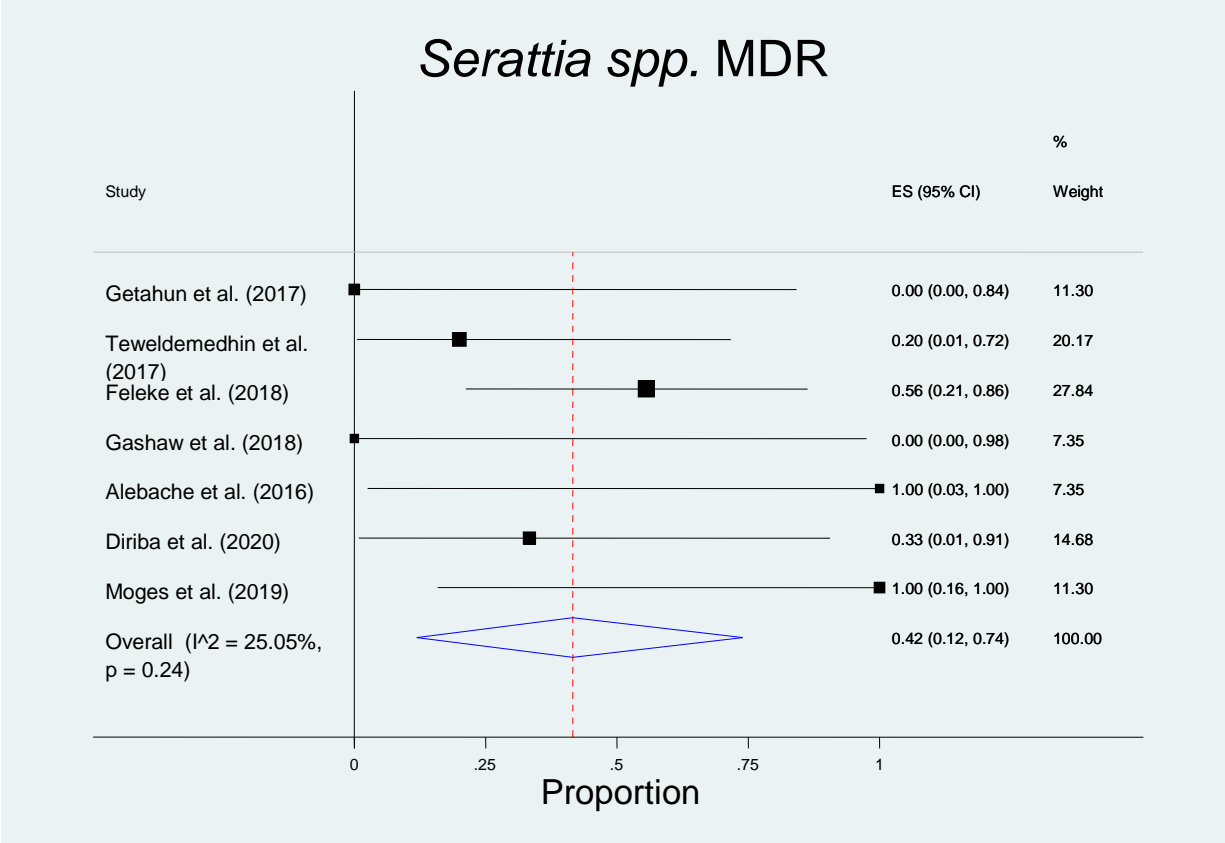

Supplementary Figure 9: Forest plot of the pooled proportion of MDR *Serattia spp.* from human sources

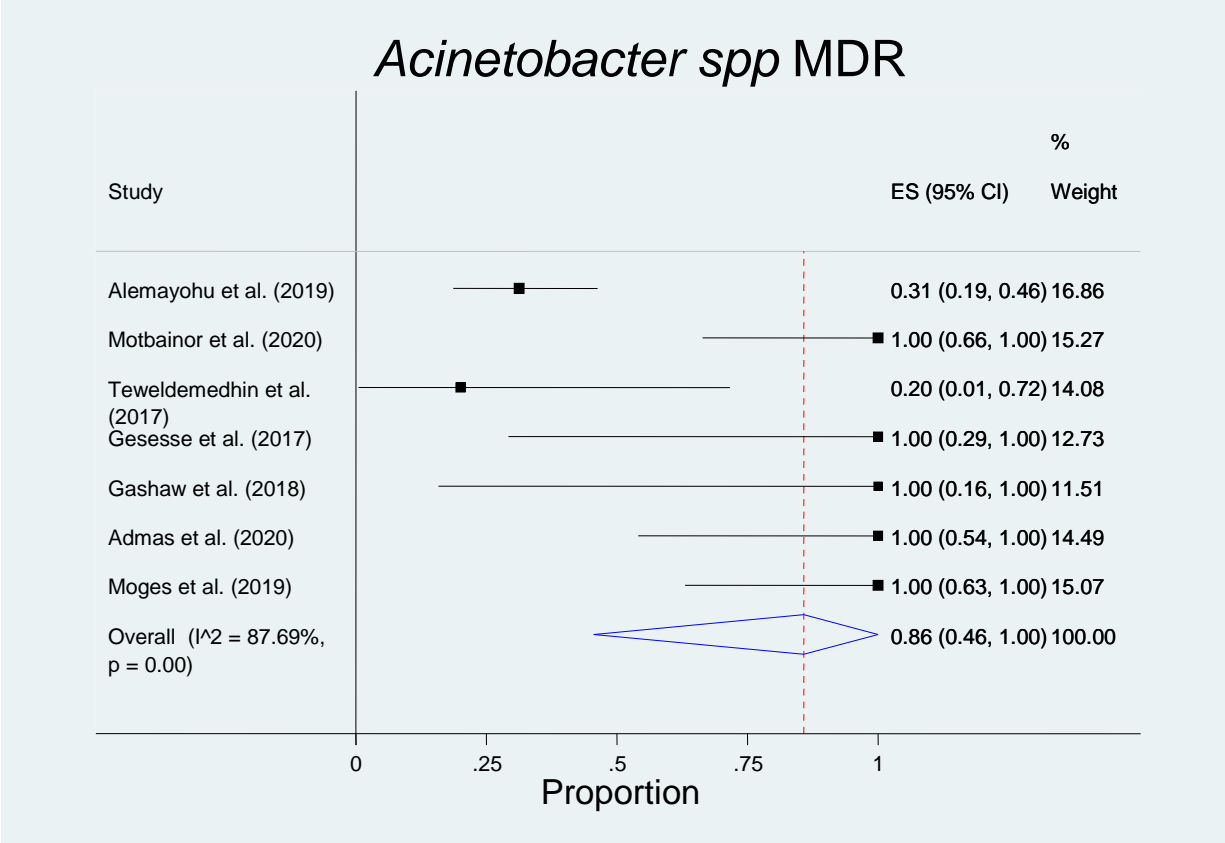

Supplementary Figure 10: Forest plot of the pooled proportion of MDR *Acinetobacter spp.* from human sources.

## *Pseudomonas spp.* MDR

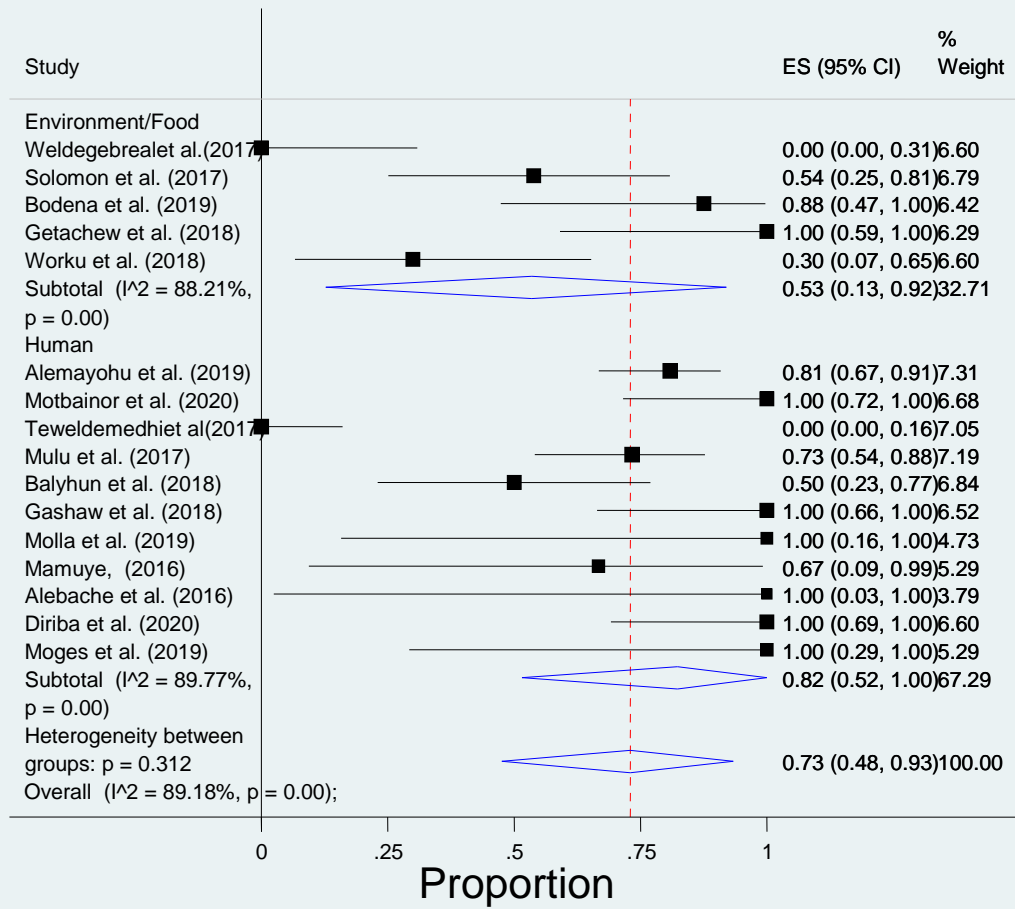

Supplementary Figure 11: Forest plot of the pooled proportion of MDR *Pseudomonas spp* from human, environment/food sources.

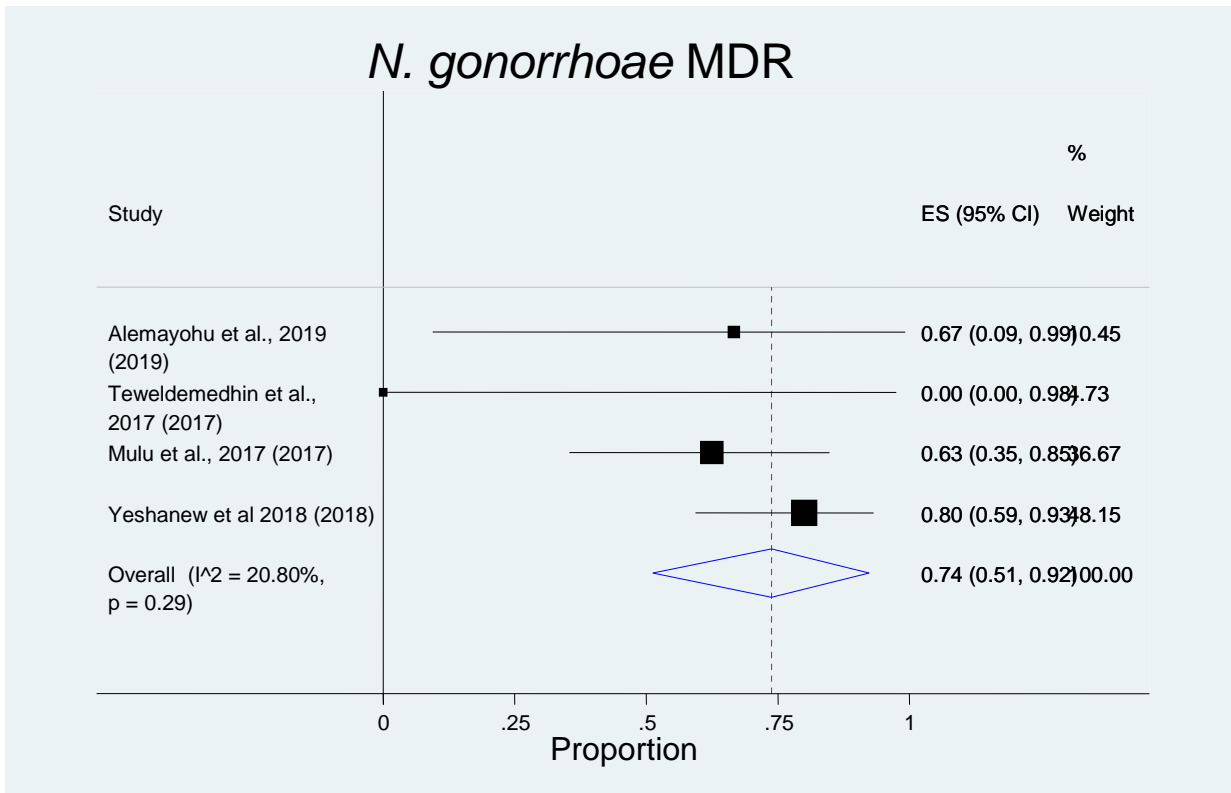

Supplementary Figure 12: Forest plot of the pooled proportion of MDR *N. gonorrhoeae* from human sources.

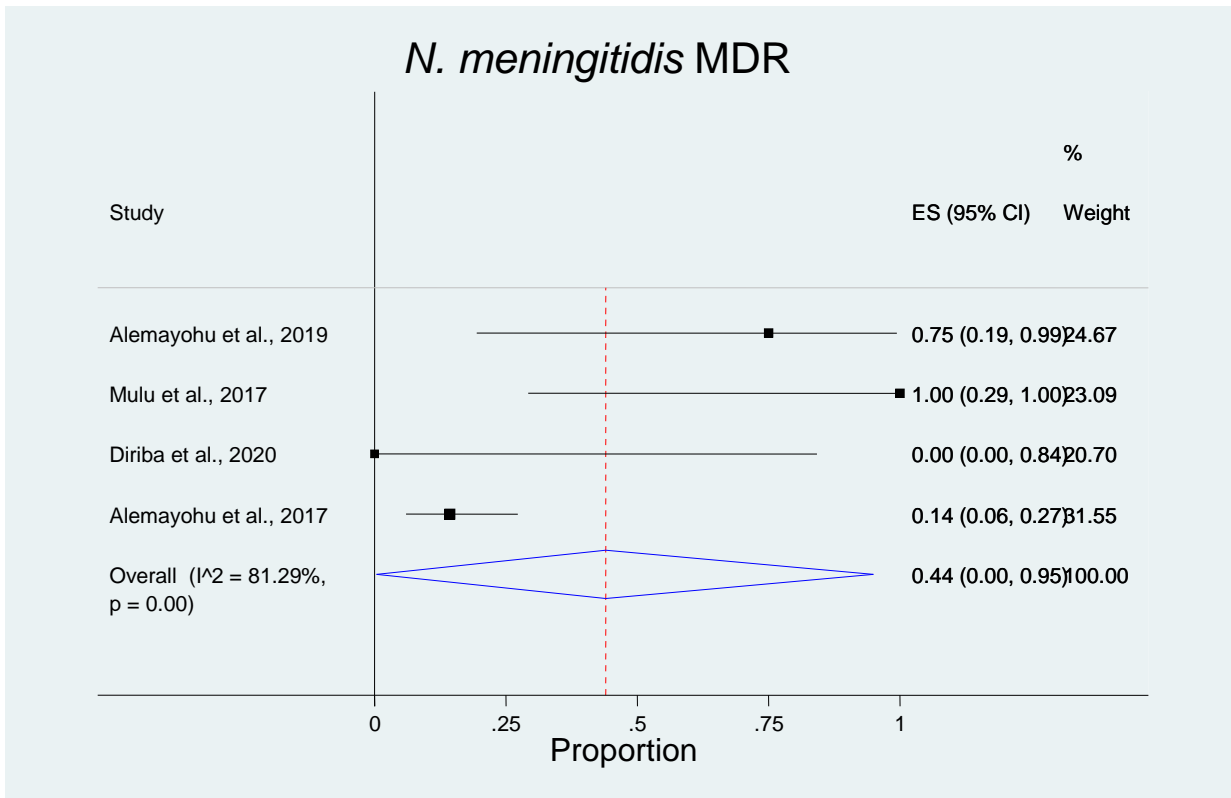

Supplementary Figure 13: Forest plot of the pooled proportion of MDR *N. meningitidis* from human sources.

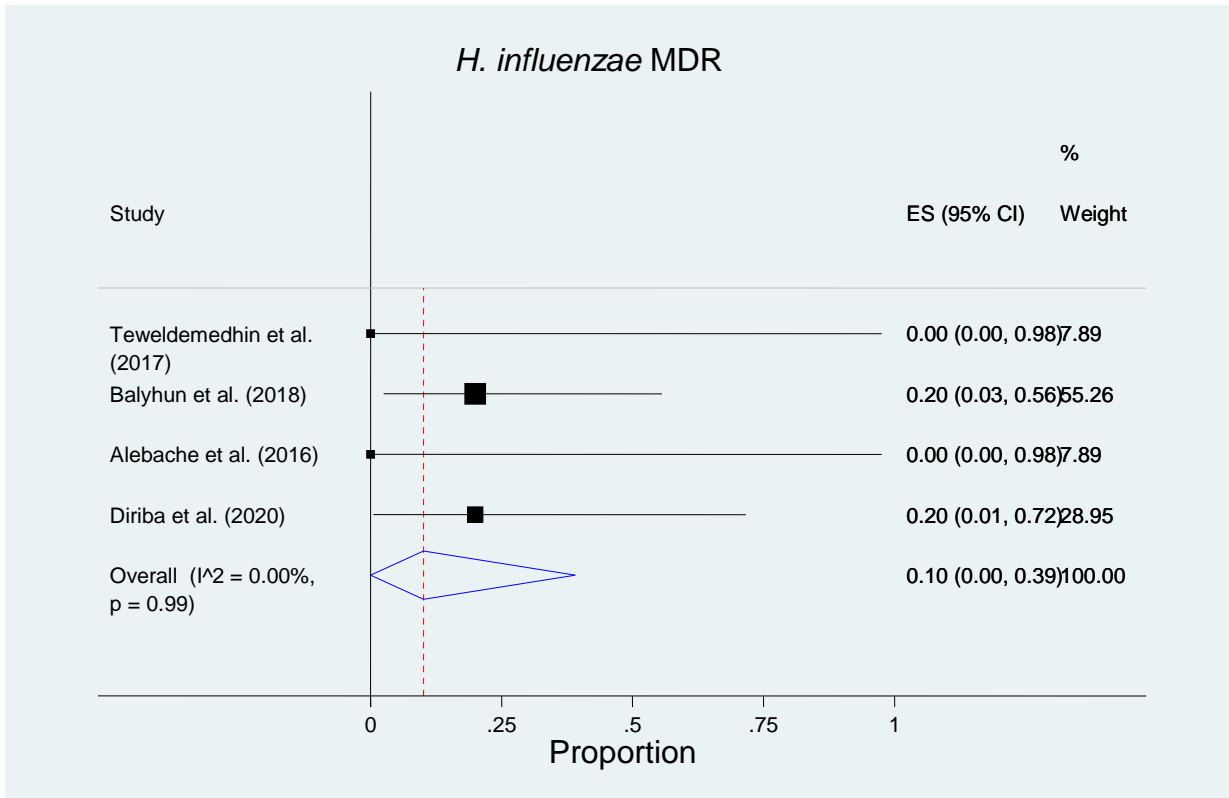

Supplementary Figure 14: Forest plot of the pooled proportion of MDR *H. influenzae* from human sources.
